# Supplementary material
Source: Springer Nature journal article supplement (https://www.springermedizin.de/resource/supplementary/12936_2009_931_MOESM2_ESM.pdf/9548562)
Supplement: MOESM2 [file 9548562]

| Antisera tested<br>Test strain | Anti-MSP1p42(R/A)                                                                  | Anti-MSP1p42(3D7)                                                                   | Anti-MSP1p42(FVO)                                                                    |
|--------------------------------|------------------------------------------------------------------------------------|-------------------------------------------------------------------------------------|--------------------------------------------------------------------------------------|
| 3D7<br>(E-TSR)                 | 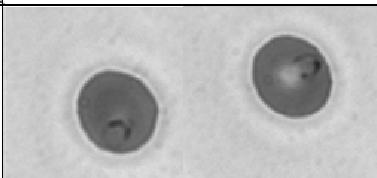  |   |   |
| FVO<br>(Q-KNG)                 |   |   |   |
| CAMP<br>(E-KNG)                |  |  |  |
